# Supplementary material for: Differentiation of cancer stem cells into erythroblasts in the presence of CoCl2
Source: PubMed Central journal article supplement (PMC8671479; doi:10.1038/s41598-021-03298-5), 2021-12-14

**Whole view of Fig. 2b (left)**

**Oct-4A**

| days              | 0 |   | 1 |   | 3 |   | 5 |   | 7 |   |
|-------------------|---|---|---|---|---|---|---|---|---|---|
| CoCl <sub>2</sub> | - | + | - | + | - | + | - | + | - | + |

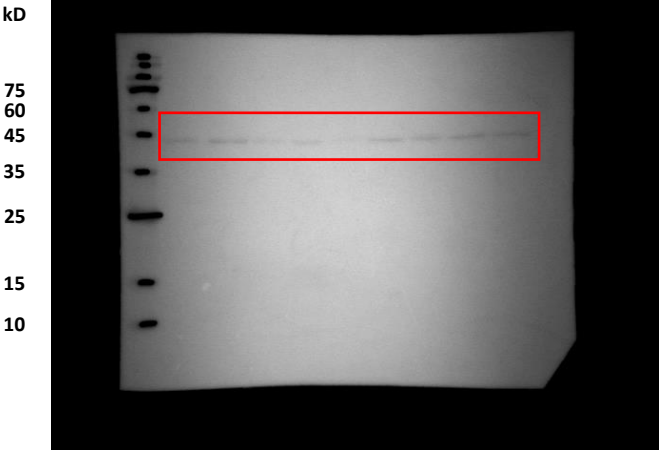

**GFP**

| days              | 0 |   | 1 |   | 3 |   | 5 |   | 7 |   |
|-------------------|---|---|---|---|---|---|---|---|---|---|
| CoCl <sub>2</sub> | - | + | - | + | - | + | - | + | - | + |

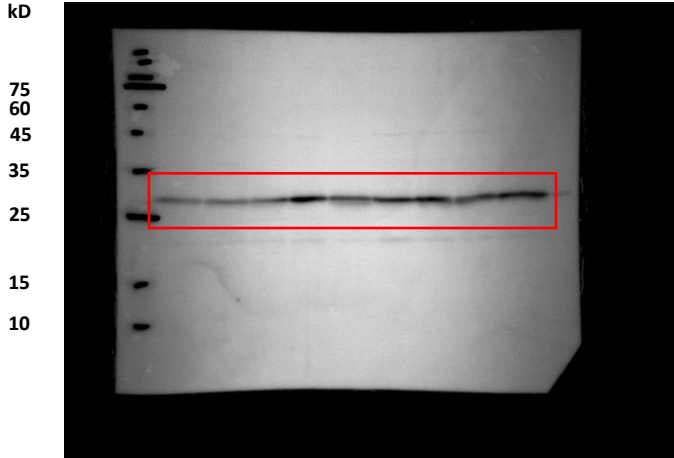

**HIF-1α**

| days              | 0 |   | 1 |   | 3 |   | 5 |   | 7 |   |
|-------------------|---|---|---|---|---|---|---|---|---|---|
| CoCl <sub>2</sub> | - | + | - | + | - | + | - | + | - | + |

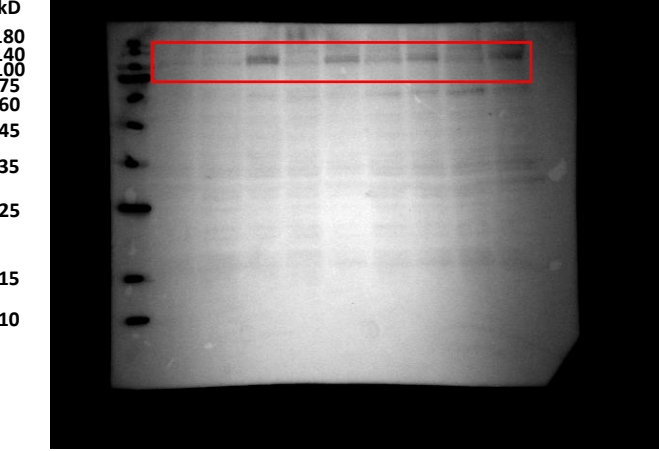

**β-tubulin**

| days              | 0 |   | 1 |   | 3 |   | 5 |   | 7 |   |
|-------------------|---|---|---|---|---|---|---|---|---|---|
| CoCl <sub>2</sub> | - | + | - | + | - | + | - | + | - | + |

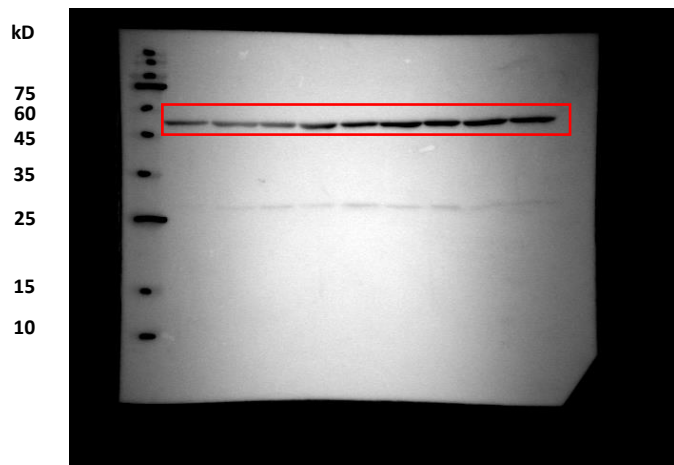

**General view of Fig. 2b (right)**

**CD31**

| days              | 0 |   | 1 |   | 3 |   | 5 |   | 7 |   |
|-------------------|---|---|---|---|---|---|---|---|---|---|
| CoCl <sub>2</sub> | - | + | - | + | - | + | - | + | - | + |

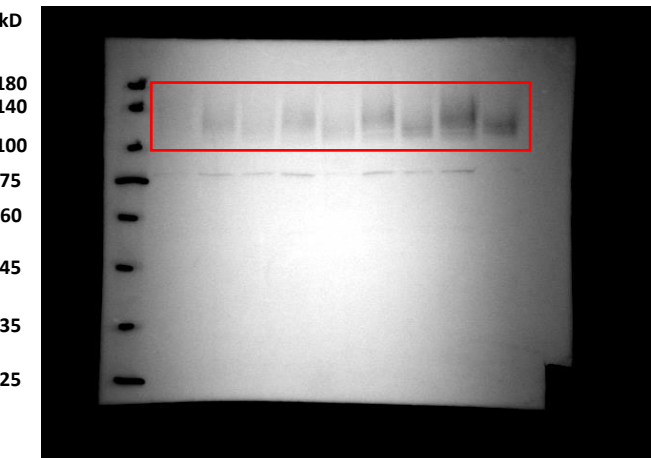

**β-tubulin**

| days              | 0 |   | 1 |   | 3 |   | 5 |   | 7 |   |
|-------------------|---|---|---|---|---|---|---|---|---|---|
| CoCl <sub>2</sub> | - | + | - | + | - | + | - | + | - | + |

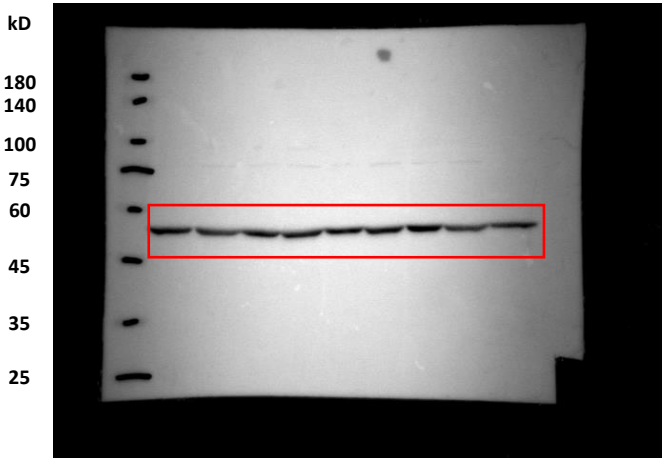

# Whole view of Fig. 4c

## CD31

| CoCl <sub>2</sub> | 3day |   | 1day |   |
|-------------------|------|---|------|---|
|                   | -    | + | -    | + |
| Oligo             | -    | - | +    | + |

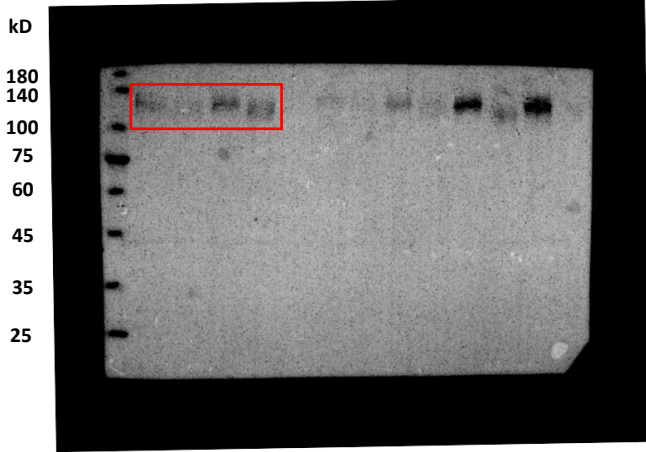

## β-actin

| CoCl <sub>2</sub> | 3day |   | 1day |   |
|-------------------|------|---|------|---|
|                   | -    | + | -    | + |
| Oligo             | -    | - | +    | + |

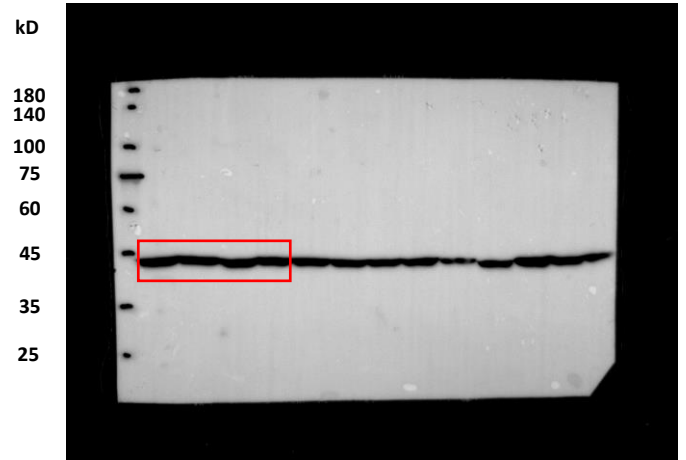

## Oct-4A

| CoCl <sub>2</sub> | 3day |   | 1day |   |
|-------------------|------|---|------|---|
|                   | -    | + | -    | + |
| Oligo             | -    | - | +    | + |

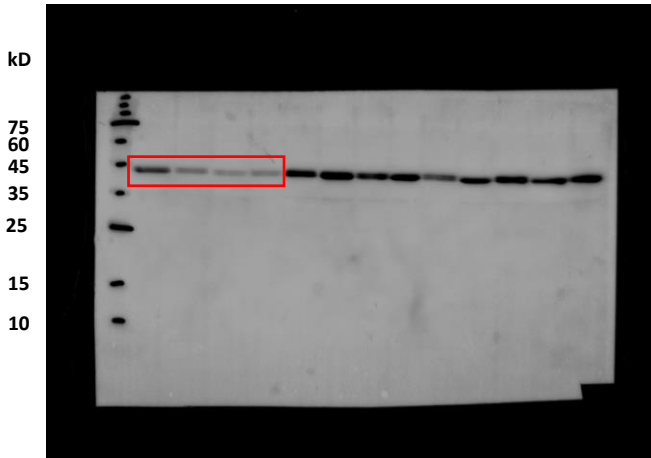

## β-actin

| CoCl <sub>2</sub> | 3day |   | 1day |   |
|-------------------|------|---|------|---|
|                   | -    | + | -    | + |
| Oligo             | -    | - | +    | + |

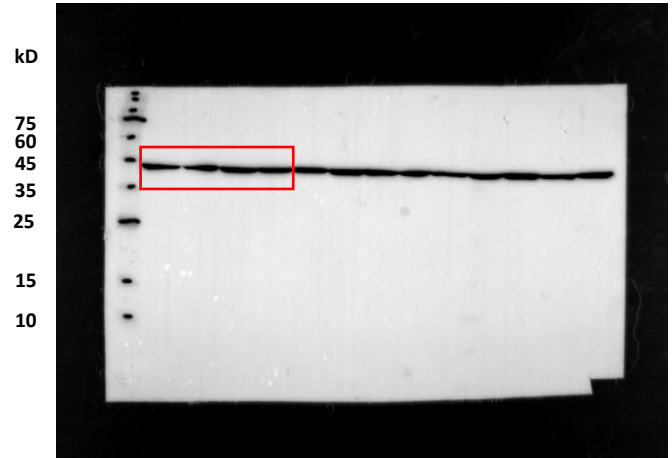

Supplement: 41598_2021_3298_MOESM1_ESM.pdf [file 41598_2021_3298_MOESM1_ESM.pdf]
